# Supplementary material for: A rare case report of Talaromyces marneffei in HIV/AIDS:numerous fungal spores on blood smears precipitate acute pancreatitis
Source: Research Square preprint supplement (doi:10.21203/rs.3.rs-7838991/v1), 2025-10-29
Supplement: Supplementary file 1 [file c11394246fb4564553c9296a.docx]

**Table S1.**PLT,CRP,PCR and IL-6 during hospitalization

| Key test | Reference Range | day1 | day 2 | day4 | day 5 |
| --- | --- | --- | --- | --- | --- |
| PLT(×109cells/L) | 125-350 | 25 | 15 | 18 | 23 |
| CRP(mg/L) | 0-5 | 125.11 | 213.85 | 222.16 | 174.49 |
| PCT(ng/ml) | 0-0.046 | 11.81 | 27.88 | 42.91 | 30.03 |
| IL-6(pg/ml) | 0-7 | 483.5 | 601.1 | 418.1 | 483.3 |

**Table S2.**LAC and α-AMY during hospitalization

| Key test | Reference Range | day2 7:58 | day2 9:16 | day4 8:00 | day4 11:35 | day4 12:02 | day5 8:36 |
| --- | --- | --- | --- | --- | --- | --- | --- |
| LAC(mmol/L) | 0.6-2.2 | 7.92 |  | 4.18 |  |  |  |
| α-AMY(U/L) | 0-220 | 293 | 297.1 | 972.3 | 803.9 | 856.1 | 709 |

**Table S3.**The score of Sequential Organ-Failure Assessment(SOFA) during hospitalization

|  | day 1 | day 2 | day 4 | day 5 |
| --- | --- | --- | --- | --- |
| Score of SOFA | 6 | 9 | 10 | 13 |

**Table S4.**National Early Warning Score (NEWS) during hospitalization

|  | day 1 | day 2 | day 3 | day 4 | day 5 | day 6 |
| --- | --- | --- | --- | --- | --- | --- |
| Score of NEWS | 7 | 10 | 9 | 10 | 13 | 16 |
